# Supplementary material for: Direct observation and spectroscopy of nanoscaled carboxylated carbonaceous fragments coated on carbon nanotubes
Source: Royal Society of Chemistry journal article supplement (doi:10.1039/c1cc11369k), 2011-01-01
Supplement: c1cc11369k.pdf [file c1cc11369k.pdf]

# **Direct observation and spectroscopy of nanoscaled carboxylated carbonaceous fragments coated on carbon nanotubes**

## **(Supporting information)**

**Jun Zhong, Tian Xie, Jiujun Deng, Xuhui Sun, Xiulian Pan, Xinhe Bao, Ziyu Wu**

### **1. Experimental details for the sample preparation.**

Raw CNTs were kindly provided by the Department of Physics and the Tsinghua-Foxconn Nanotechnology Research Center of the Tsinghua University. These CNTs contain from three to five carbon layers with an inner and outer diameters of 4-8 and 6-10 nm, respectively. Raw CNTs were pretreated in HNO<sub>3</sub> following a procedure described in Ref. 8. After the treatment the materials were evacuated to 10<sup>-4</sup> Pa at 400 °C and exposed to TiCl<sub>4</sub> vapors. The mixture was kept at 100 °C for 48 h, followed by washing with anhydrous ethanol to allow slow hydrolysis of TiCl<sub>4</sub> under Ar atmosphere. Samples were left at ambient conditions for two days before drying at 120 °C.
